# Supplementary material for: When Trust Fails: The Relation Between Children’s Trust Beliefs in Peers and their Peer Interactions in a Natural Setting
Source: Springer Nature journal article supplement (doi:10.1007/s10802-013-9835-8), 2014-01-27

Figure 4: Linear and Quadratic Relations for Girls Between Trust Beliefs in Peers and Group Interaction for Negatively Received Bids


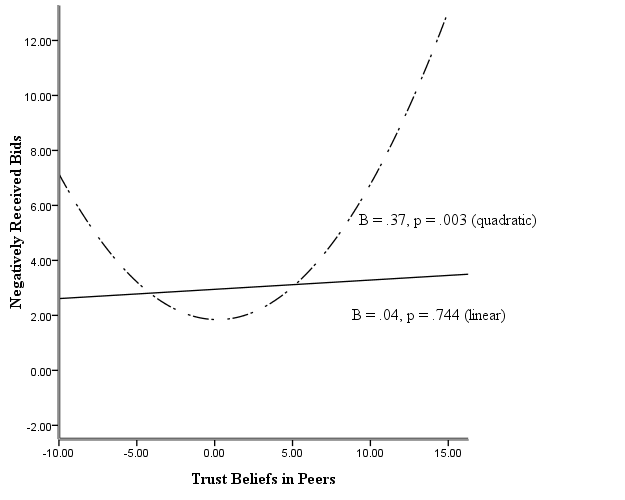

Supplement: MOESM1 [file 541976]
