# Supplementary material for: When Trust Fails: The Relation Between Children’s Trust Beliefs in Peers and their Peer Interactions in a Natural Setting
Source: Springer Nature journal article supplement (doi:10.1007/s10802-013-9835-8), 2014-01-27

Figure 9: Linear and Quadratic Relations Between Trust Beliefs in Peers and Passive Behavior for Boys


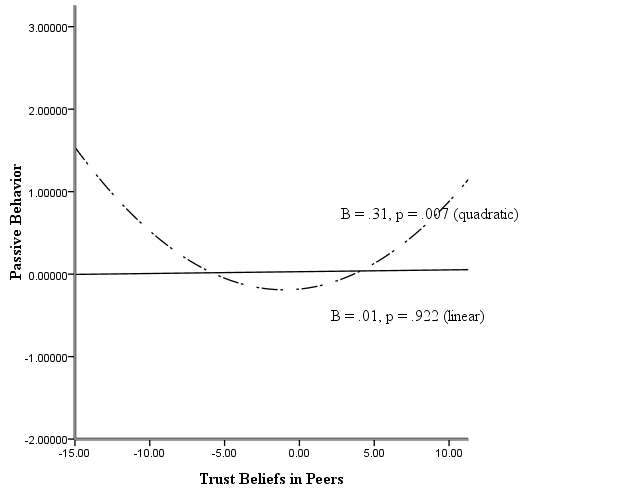

Supplement: MOESM6 [file 541976]
